# Supplementary material for: An integrated genetic linkage map for white clover (Trifolium repens L.) with alignment to Medicago
Source: PubMed Central journal article supplement (PMC3693905; doi:10.1186/1471-2164-14-388), 2013-06-10

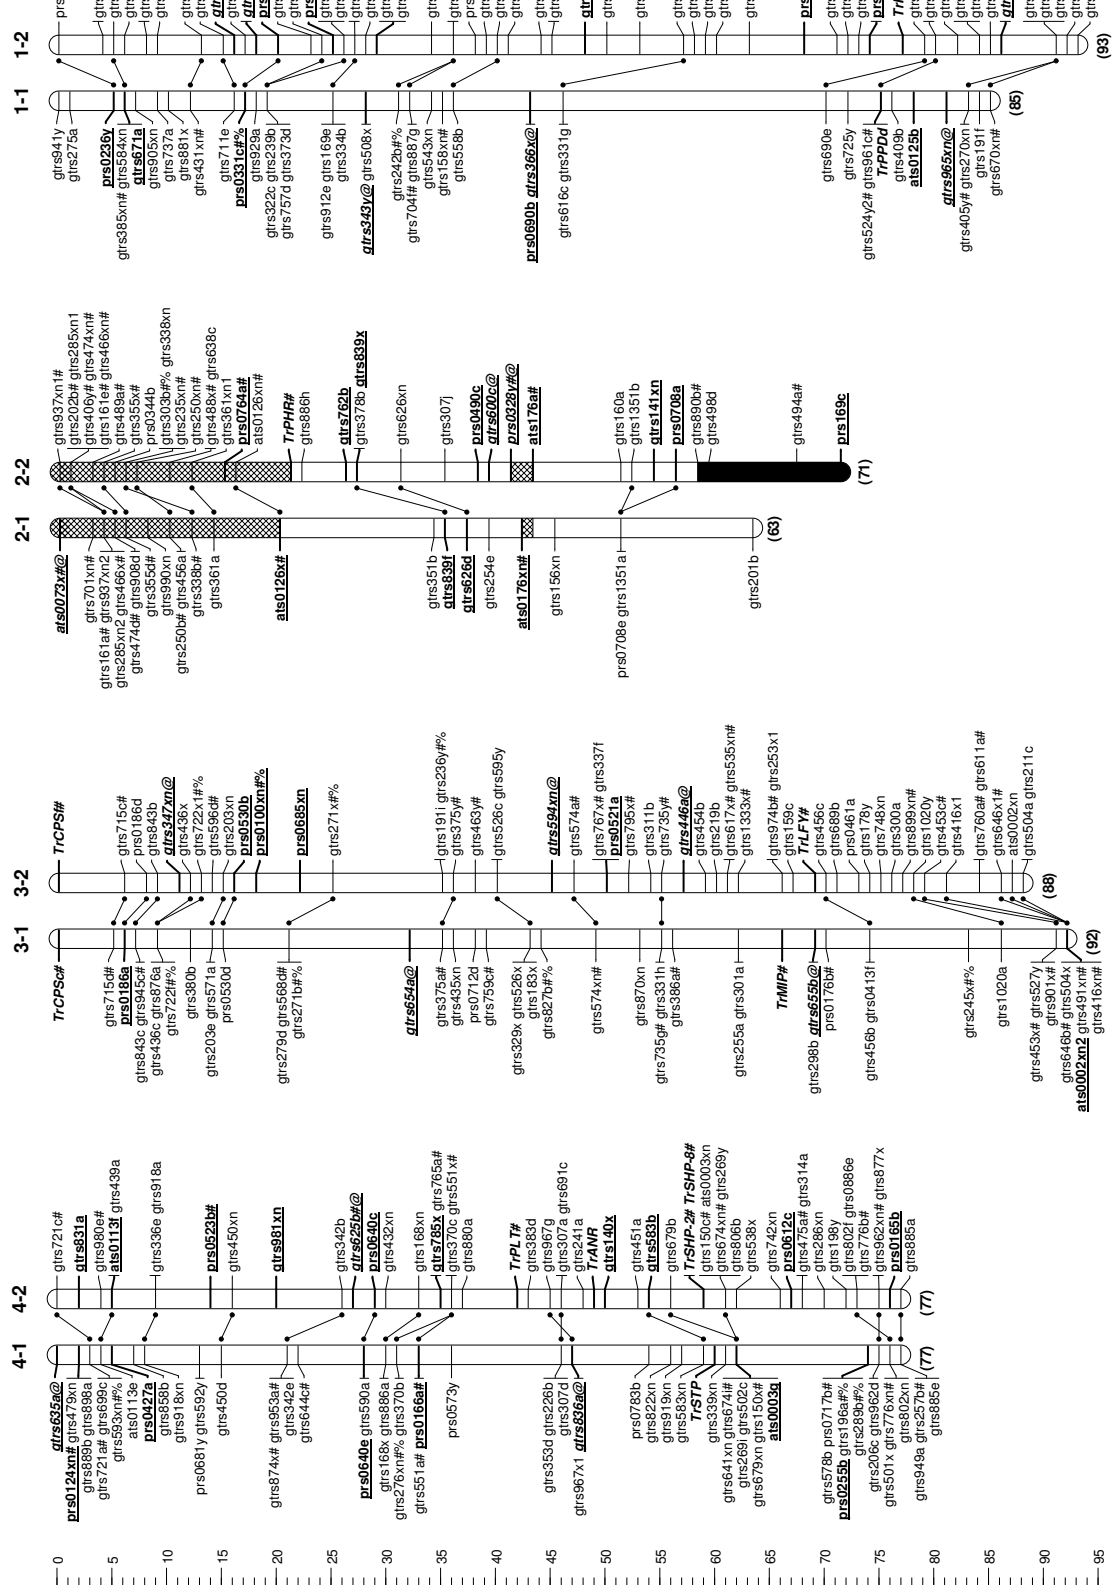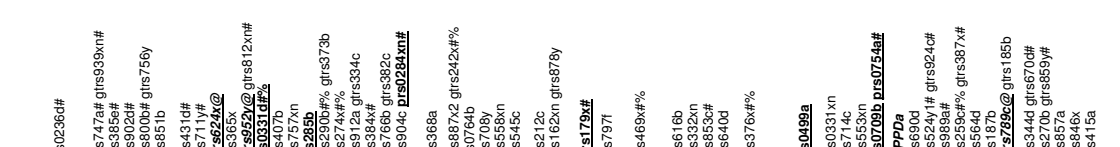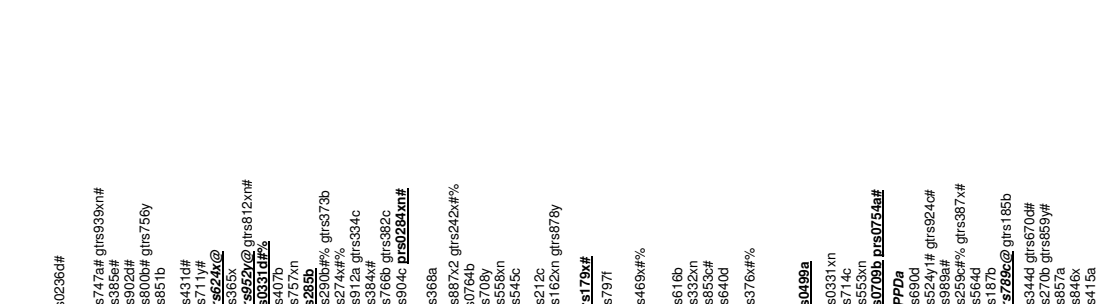

Supplement: 1471-2164-14-388-S3.pdf [file 1471-2164-14-388-S3.pdf]
